# Supplementary material for: Chromosome-breakage genomic instability and chromothripsis in breast cancer
Source: PubMed Central journal article supplement (PMC4227294; doi:10.1186/1471-2164-15-579), 2014-07-09

Figure S1. BIP instability is correlated with the proportion of genome altered

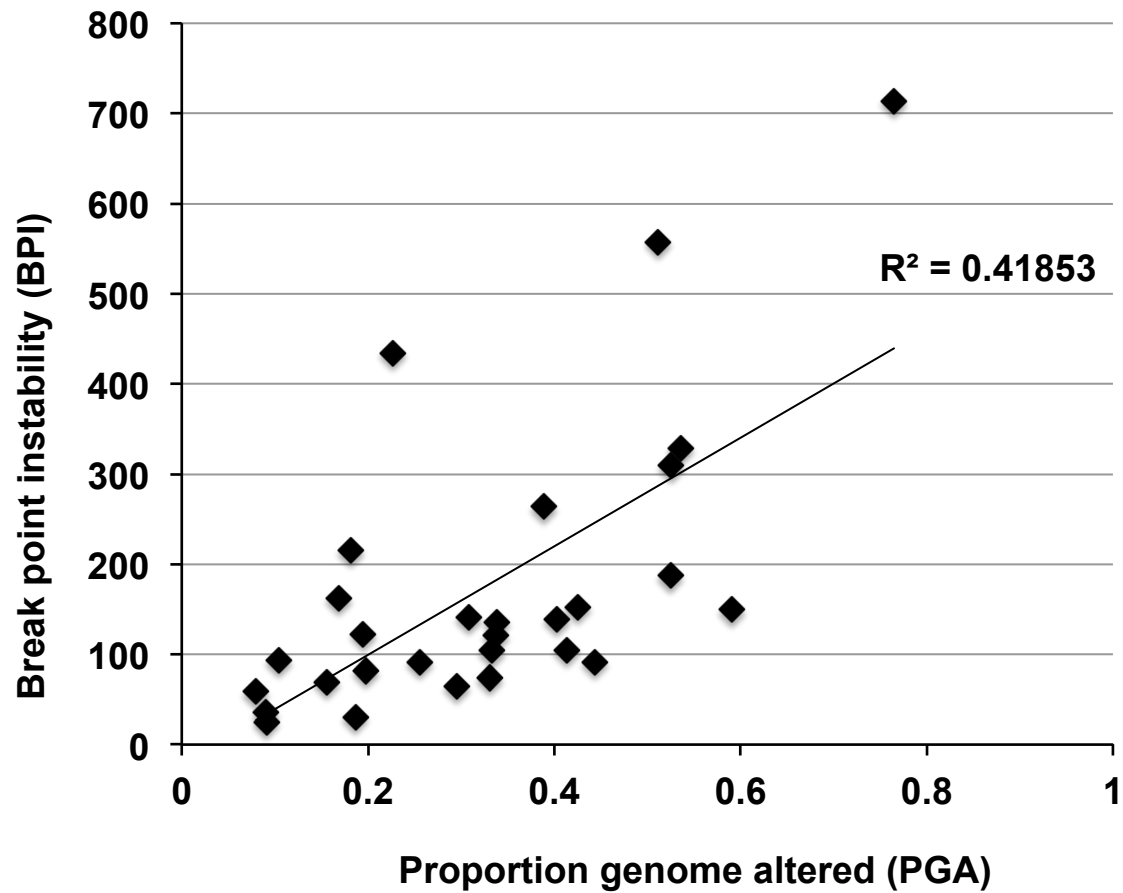

Supplement: 12864_2014_7063_MOESM1_ESM.pdf [file 12864_2014_7063_MOESM1_ESM.pdf]
