# Supplementary material for: Chromosome-breakage genomic instability and chromothripsis in breast cancer
Source: PubMed Central journal article supplement (PMC4227294; doi:10.1186/1471-2164-15-579), 2014-07-09

**Figure S2. Densities of break-points on individual chromosomes in three clinical subtypes.**

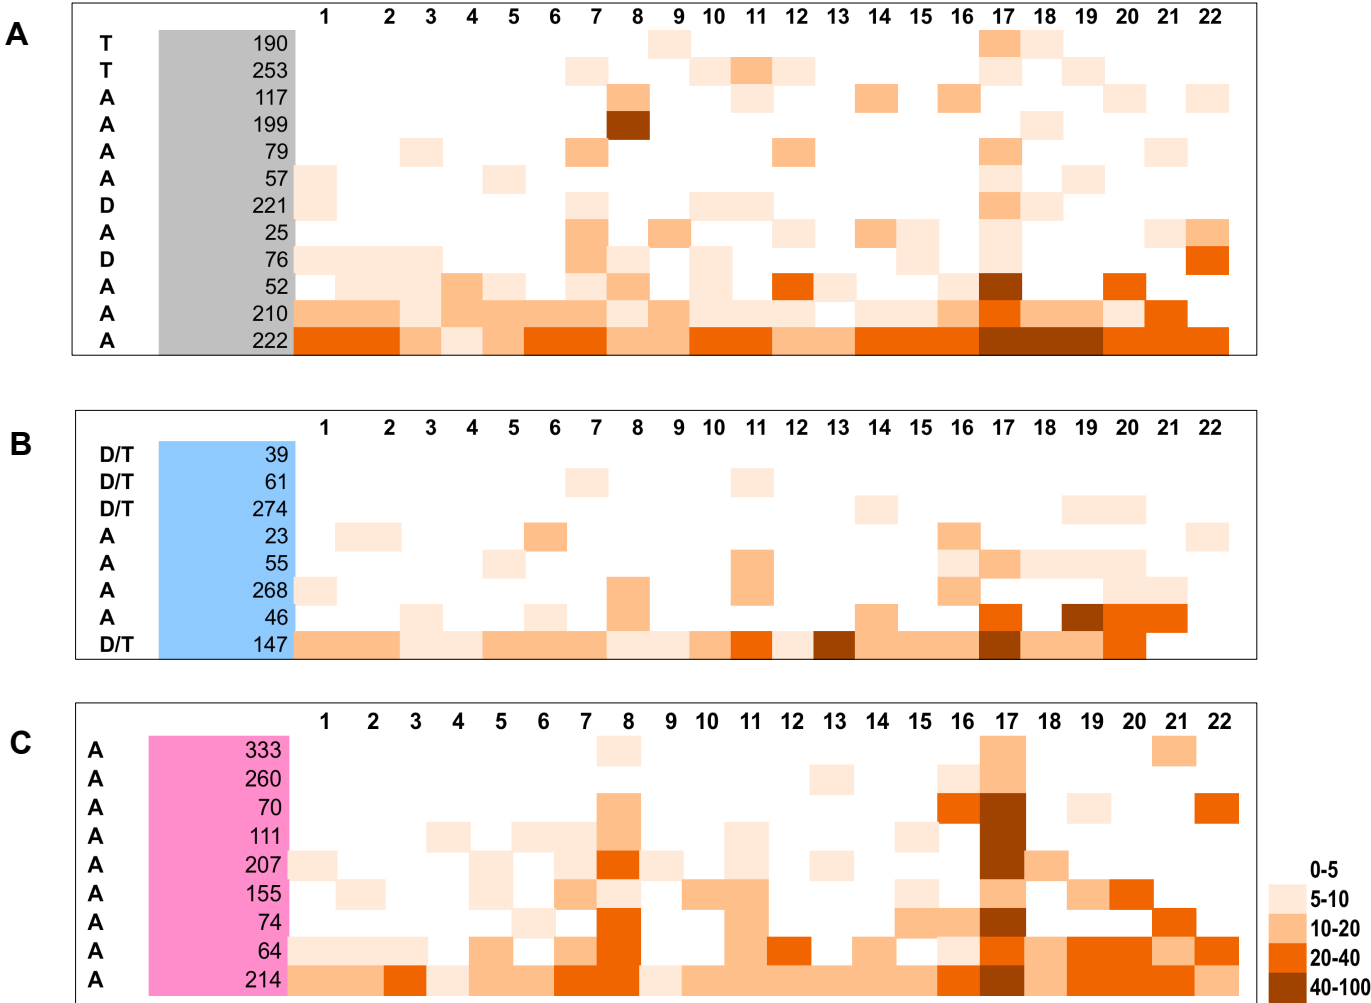

Supplement: 12864_2014_7063_MOESM2_ESM.pdf [file 12864_2014_7063_MOESM2_ESM.pdf]
